# Supplementary material for: Effects of dextromethorphan as add‐on to sitagliptin on blood glucose and serum insulin concentrations in individuals with type 2 diabetes mellitus: a randomized, placebo‐controlled, double‐blinded, multiple crossover, single‐dose clinical trial
Source: PubMed Central journal article supplement — Diabetes Obes Metab. 2015 Oct 26;18(1):100–3. doi: 10.1111/dom.12576 (PMC5057326; doi:10.1111/dom.12576), 2015-10-26
Supplement: DOM-18-100-s002.pdf [file DOM-18-100-s002.pdf]

## DOM DXM2 Suppl. Table 1

---

|                                |                            |
|--------------------------------|----------------------------|
| Sex (n, % male)                | 20, 100%                   |
| Age (years)                    | 63.1 ± 7.1 (48 - 70)       |
| BMI (kg/m <sup>2</sup> )       | 30.2 ± 2.6 (25.6 - 34.7)   |
| Diabetes diagnosis (years)     | 10.6 ± 6.5 (1.9 - 31.9)    |
| Fasting plasma glucose (mg/dl) | 137.4 ± 21.1 (106 - 185.5) |
| HbA1c (%)                      | 7.2 ± 0.4 (6.5 - 8)        |

---
