# Supplementary material for: Effects of dextromethorphan as add‐on to sitagliptin on blood glucose and serum insulin concentrations in individuals with type 2 diabetes mellitus: a randomized, placebo‐controlled, double‐blinded, multiple crossover, single‐dose clinical trial
Source: PubMed Central journal article supplement — Diabetes Obes Metab. 2015 Oct 26;18(1):100–3. doi: 10.1111/dom.12576 (PMC5057326; doi:10.1111/dom.12576), 2015-10-26
Supplement: DOM-18-100-s003.pdf [file DOM-18-100-s003.pdf]

## DOM DXM2 Suppl. Table 2

|                                      | AUC Glucose<br>1-5 h (mg/dl/h) | AUC Insulin<br>1-5 h (mU/l/h) | AUC Glucagon<br>1-5 h (pmol/l/h) |
|--------------------------------------|--------------------------------|-------------------------------|----------------------------------|
| <i>0-4 h after starting the OGTT</i> |                                |                               |                                  |
| <b>Placebo</b>                       | 833.1 ± 156.9                  | 113.5 ± 68.9                  | 194.5 ± 33.6                     |
| <b>Sita</b>                          | 778.9 ± 167.8*                 | 153.3 ± 73.6*                 | 194.5 ± 38.8                     |
| <b>DXM 30</b>                        | 820.5 ± 144.2‡                 | 125.0 ± 73.1‡                 | not analyzed                     |
| <b>DXM 30 + Sita</b>                 | 758.8 ± 156.7** †              | 154.7 ± 76.1** †              |                                  |
| <b>DXM 60</b>                        | 799.8 ± 172.3                  | 137.7 ± 88.2                  | 193.4 ± 27.9                     |
| <b>DXM 60 + Sita</b>                 | 746.0 ± 165.5** †              | 159.8 ± 82.6** †              | 195.1 ± 36.8                     |
| <b>DXM 90</b>                        | 823.6 ± 168.7‡                 | 120.4 ± 82.3‡                 | not analyzed                     |
| <b>DXM 90 + Sita</b>                 | 744.1 ± 186.7** ††             | 162.4 ± 77.1** ††             |                                  |
