# Supplementary material for: Effects of dextromethorphan as add‐on to sitagliptin on blood glucose and serum insulin concentrations in individuals with type 2 diabetes mellitus: a randomized, placebo‐controlled, double‐blinded, multiple crossover, single‐dose clinical trial
Source: PubMed Central journal article supplement — Diabetes Obes Metab. 2015 Oct 26;18(1):100–3. doi: 10.1111/dom.12576 (PMC5057326; doi:10.1111/dom.12576), 2015-10-26
Supplement: DOM-18-100-s004.pdf [file DOM-18-100-s004.pdf]

# DOM DXM2 Suppl. Table 3

|                      | AUC Glucose 0-1 h<br>(mg/dl/h)  | AUC Insulin 0-1 h<br>(mU/h) | AUC Glucagon 0-1 h<br>(pmol/h) |
|----------------------|---------------------------------|-----------------------------|--------------------------------|
|                      | <i>before starting the OGTT</i> |                             |                                |
| <b>Placebo</b>       | 125.6 ± 16.4                    | 14.1 ± 7.0                  | 56.2 ± 11.8                    |
| <b>Sita</b>          | 126.4 ± 16.8                    | 14.8 ± 9.8                  | 54.9 ± 10.1                    |
| <b>DXM 30</b>        | 128.5 ± 18.0                    | 14.6 ± 8.4                  | not analyzed                   |
| <b>DXM 30 + Sita</b> | 126.1 ± 17.0                    | 17.1 ± 13.1* ‡              |                                |
| <b>DXM 60</b>        | 124.6 ± 20.7                    | 12.9 ± 6.8                  | 54.2 ± 8.4                     |
| <b>DXM 60 + Sita</b> | 125.6 ± 18.4                    | 16.0 ± 8.4†                 | 56.4 ± 13.1                    |
| <b>DXM 90</b>        | 130.0 ± 22.5                    | 17.3 ± 16.8                 | not analyzed                   |
| <b>DXM 90 + Sita</b> | 128.5 ± 20.1                    | 15.1 ± 8.9                  |                                |
