# Supplementary figures and images for: Effects of dextromethorphan as add‐on to sitagliptin on blood glucose and serum insulin concentrations in individuals with type 2 diabetes mellitus: a randomized, placebo‐controlled, double‐blinded, multiple crossover, single‐dose clinical trial
Source: PubMed Central journal article supplement — Diabetes Obes Metab. 2015 Oct 26;18(1):100–3. doi: 10.1111/dom.12576 (PMC5057326; doi:10.1111/dom.12576), 2015-10-26

# DOM DXM2 Suppl.Figure 1

CONSORT Flow diagram

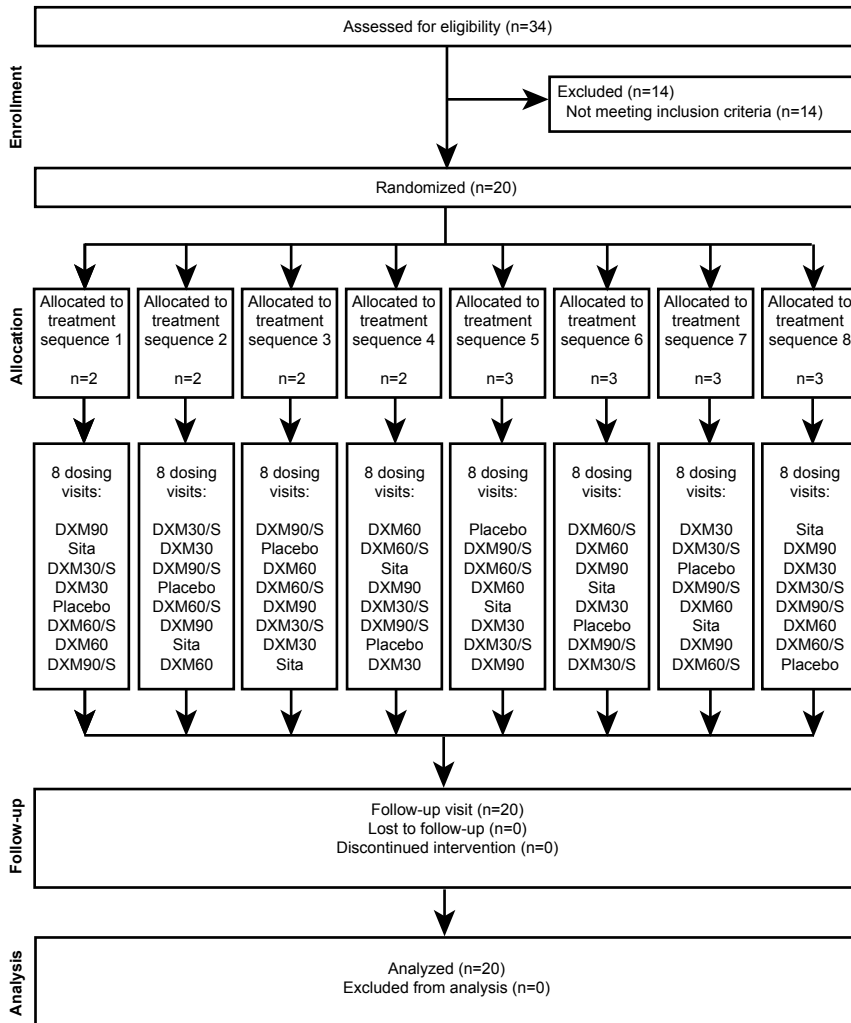

Supplement: DOM-18-100-s001.pdf [file DOM-18-100-s001.pdf]
